# Supplementary material for: C-type lectin receptors Mcl and Mincle control development of multiple sclerosis–like neuroinflammation
Source: PubMed Central journal article supplement (PMC6994148; doi:10.1172/jci125857), 2020-01-13
Supplement: jci-130-125857-s201.pdf [file jci-130-125857-s201.pdf]

## Supplementary Materials:

**Figure S1.** The protective effect of CLRc is dependent on infiltrating immune cells, but not on resident microglia.

**Figure S2.** Gating strategies for rat and human flow cytometry.

**Figure S3.** Correlation between *Mcl/Mincle* expression and clinical EAE parameters.

**Figure S4.** Reduced frequency of Mcl- and Mincle-expressing cells in CLRc congenic rats.

**Figure S5.** CLRc bone-marrow-derived macrophages and dendritic cells have a reduced response to Mcl/Mincle stimulation.

**Figure S6.** Evaluation of siRNA silencing of *Mcl* and *Mincle* in vitro.

**Fig. S7.** Expression of the MCL/MINCLE signaling pathway in MS patients.

**Table S1.** Genotyping of the CLRc region on rat chromosome 4.

**Table S2.** Correlation between CLR gene expression in spleen and different EAE phenotypes 35 days after EAE induction in (DAXPVG)xDA backcross rats.

**Table S3.** Baseline characteristics of the human brain cohort.

**Table S4.** Baseline characteristics of the human RNA-sequencing cohort.

**Table S5.** Baseline characteristics of the human in vitro stimulation cohort.

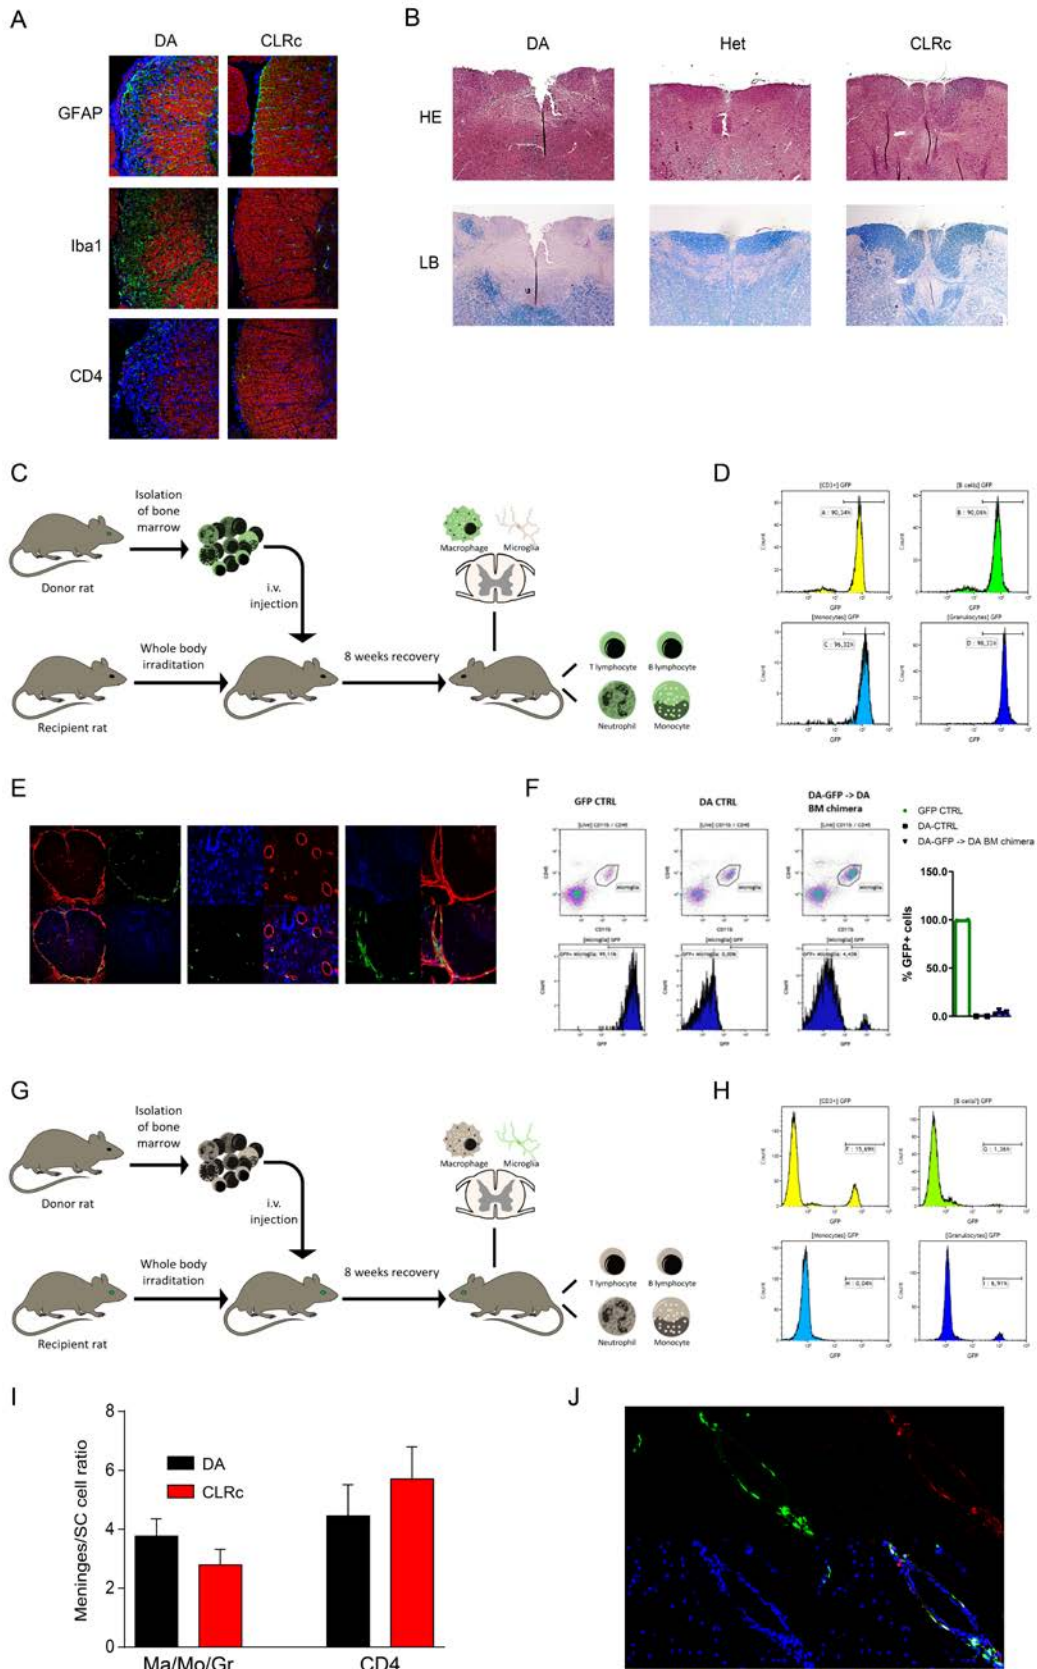

**Fig. S1. The protective effect of CLRC is dependent on infiltrating immune cells but not microglia.** (A) Immunofluorescent staining of DA and CLRC spinal cord day 24 p.i. Representative images of astrocytes (GFAP, green), microglia/macrophages (Iba1, green), and

T cells (CD4, green) along with myelin (fluoromyelin, red) and nuclei (DAPI, blue) (magnification 20X). **(B)** Histopathological analysis of brain (medulla) at day 29 p.i. Representative images of H&E and Luxol fast blue (LB) stainings (magnification 40X). **(C)** Schematic illustration of the bone marrow (BM) transfer (DA-GFP BM -> DA or CLRc) **(D)** Representative flow cytometry analysis of blood cells from BM transferred rats assessing level of reconstitution in DA-GFP -> DA rats at 8 weeks post transfer. **(E)** Immunofluorescent staining of sections from naïve BM-transferred rats assessing the replacement of meningeal and perivascular macrophages with donor BM-derived cells. BM-derived cells (GFP, green), meninges and blood vessels visualized by basal lamina staining (laminin, red), cell nuclei (DAPI, blue). Magnification for each panel, from left to right: 10X, 40X and 40X. **(F)** Flow cytometry analysis of spinal cord microglia from BM transferred rats assessing level of reconstitution in DA-GFP -> DA rats at 8 weeks post transfer. *Left*, representative flow cytometry plots. *Right*, quantification of GFP<sup>+</sup> microglia for DA-GFP ( $n=2$ ), DA ( $n=2$ ) and DA-GFP -> DA rats ( $n=4$ ). **(G)** Schematic illustration of BM-transfer DA or CLRc BM -> DA-GFP. **(H)** Representative flow cytometry analysis assessing reconstitution efficiency in DA -> DA-GFP. **(I)** Ratio of the numbers of monocytes/macrophages/granulocytes and CD4<sup>+</sup> T cells infiltrating the meninges compared to spinal cord prior to EAE onset. Data are presented as mean  $\pm$  SEM. **(J)** Immunofluorescent staining of immunized asymptomatic DA-GFP -> DA spinal cord day 31 p.i. assessing expression of Mcl (red) in GFP cells present in the meninges, nuclei stained with DAPI (blue) (magnification 40X).

A

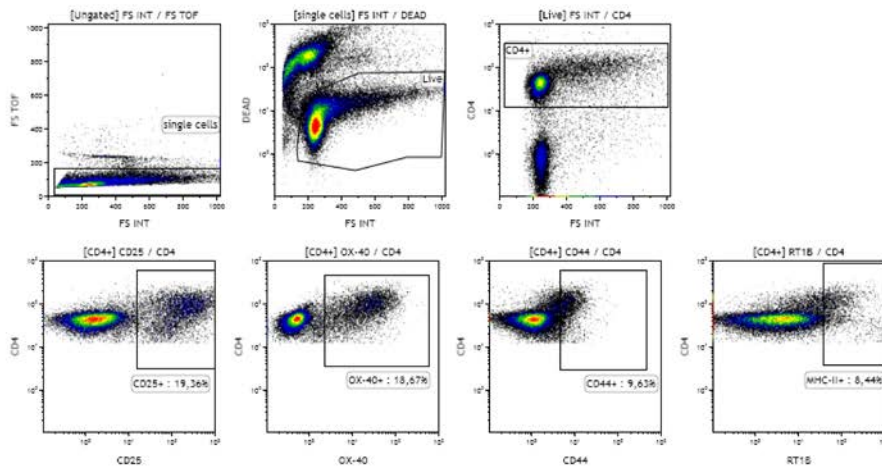

B

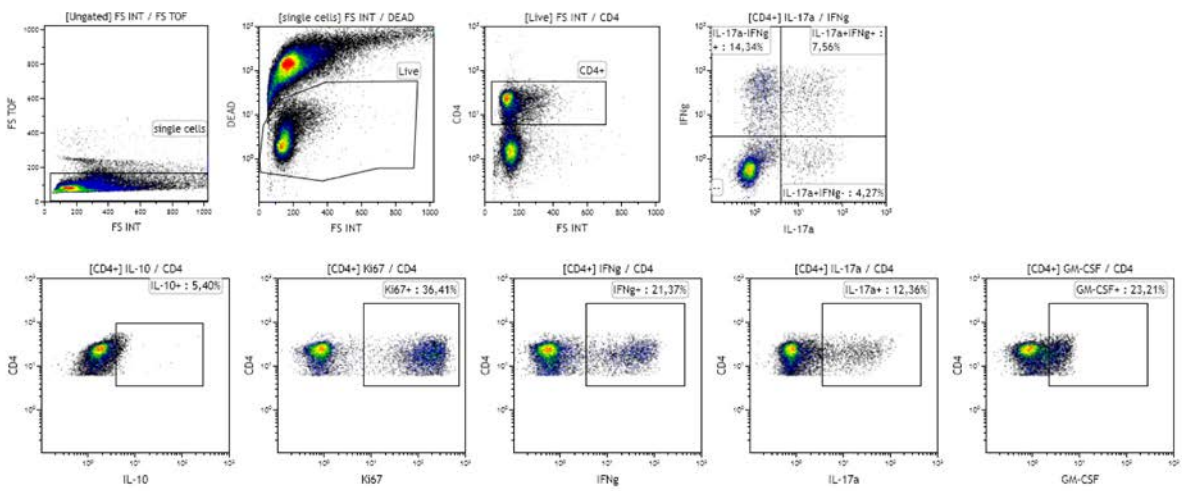

C

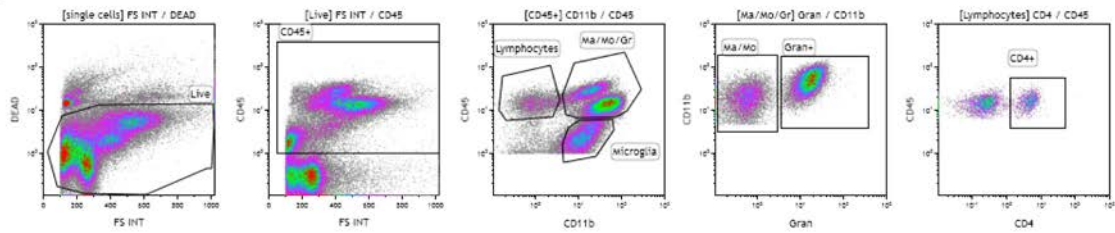

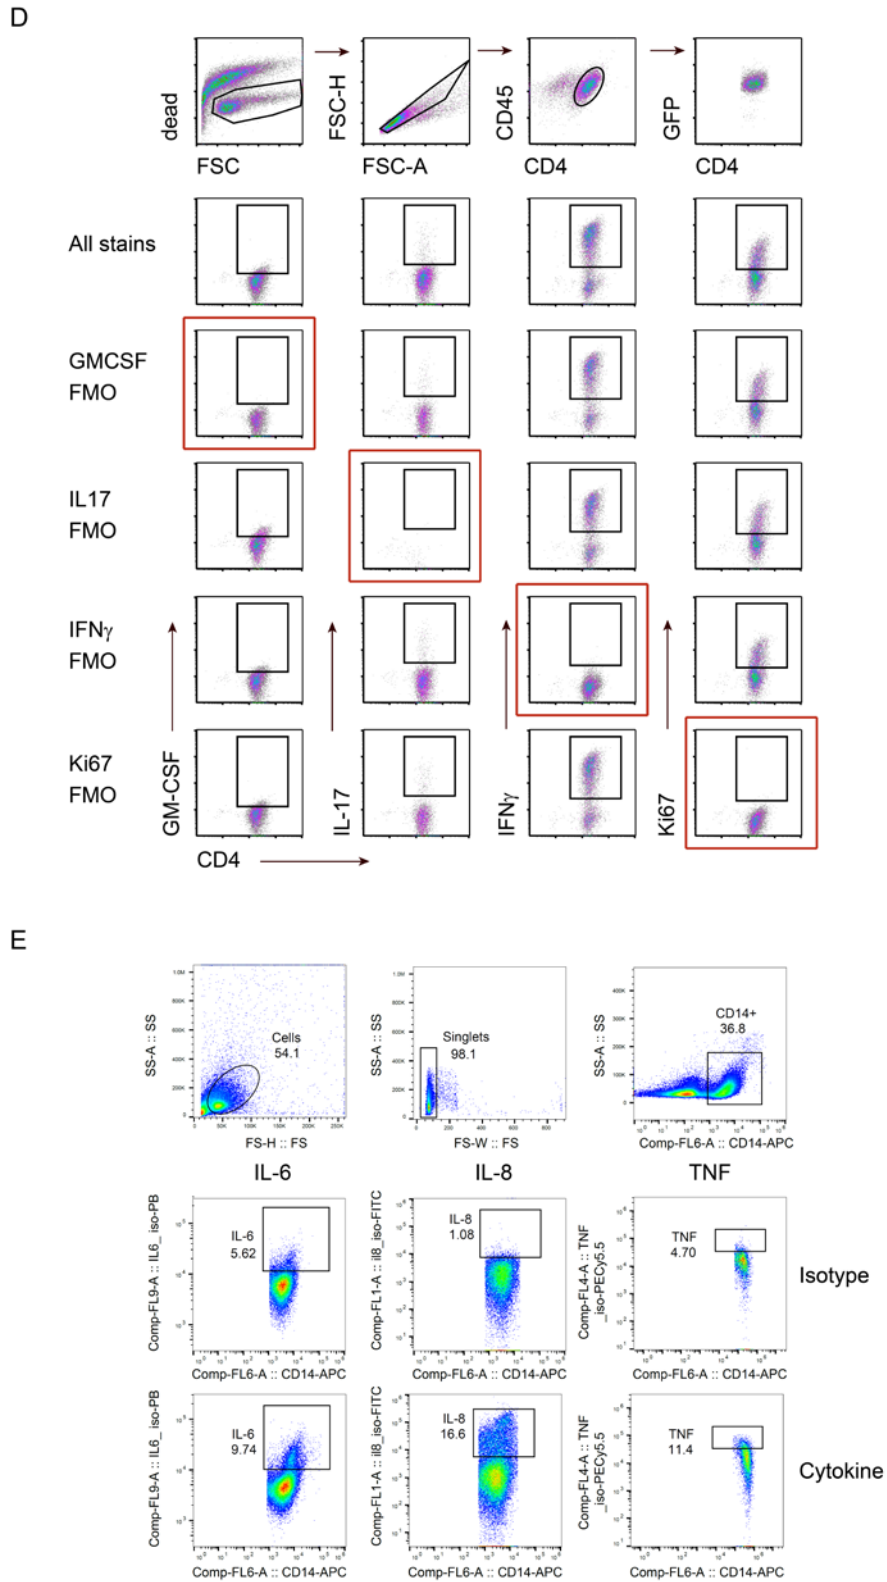

**Fig. S2. Gating strategies for flow cytometry. (A)** Gating strategy for CD4<sup>+</sup> T cell activation markers. **(B)** Gating strategy for intracellular cytokine expression and the proliferation marker Ki67. **(C)** Gating strategy for CNS immune cell subpopulations. **(D)** FMO stainings for assessment of rat CD4<sup>+</sup> T cell cytokine secretion. **(E)** Gating scheme for assessment of cytokine secretion from human monocytes.

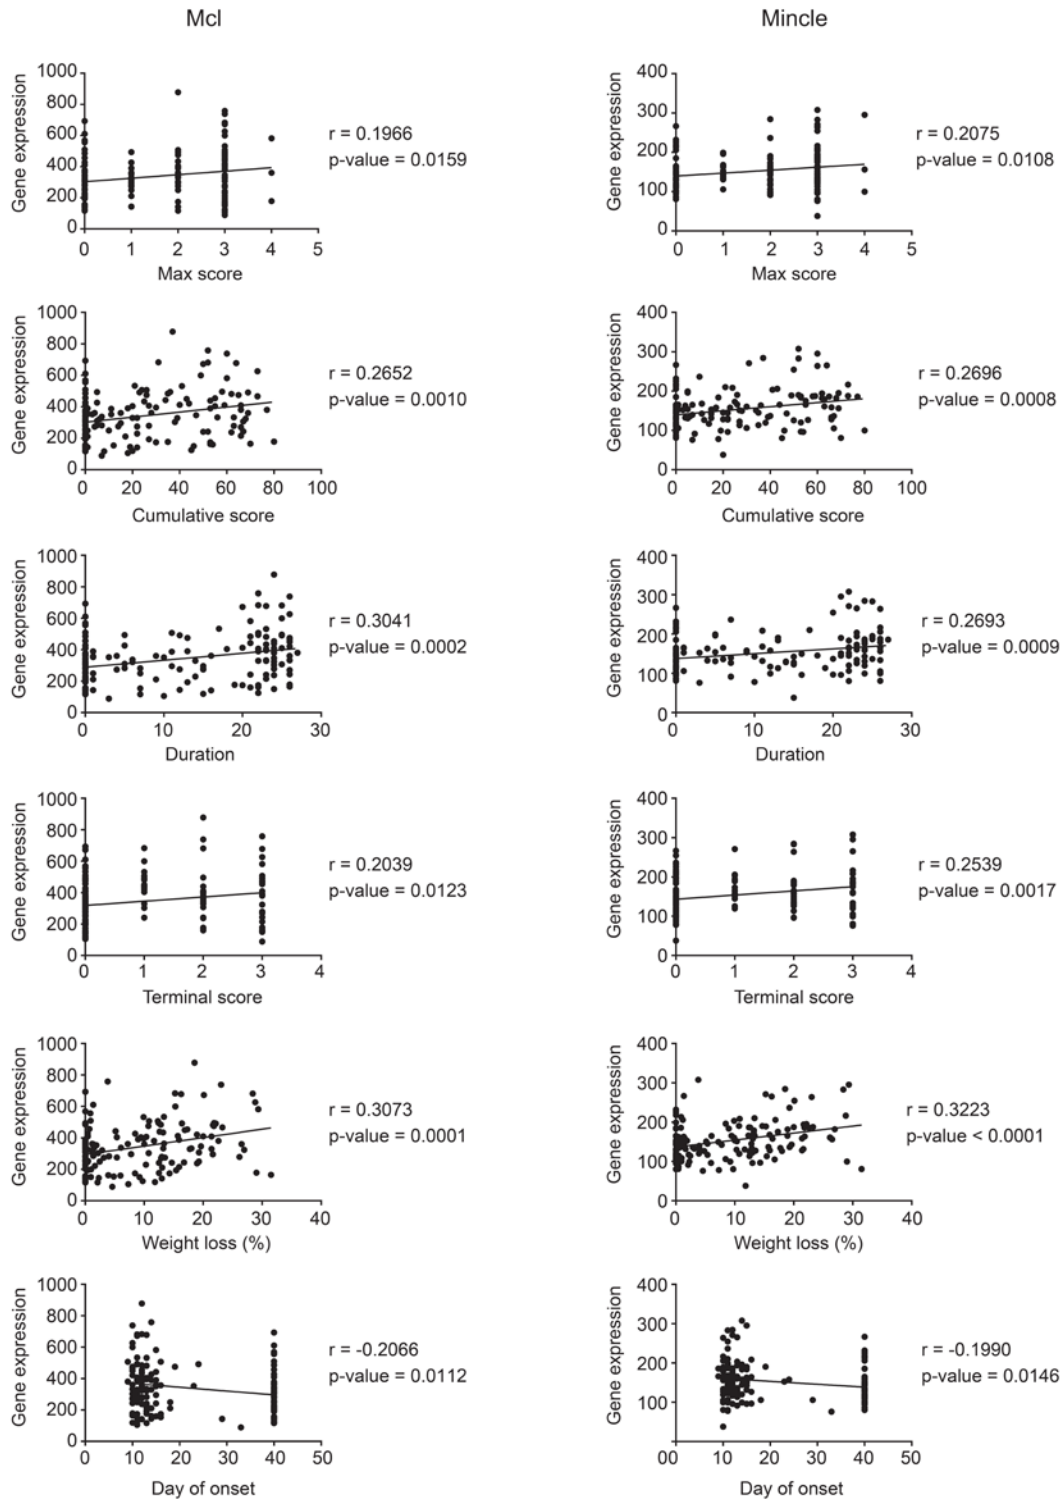

**Fig. S3. Correlation between *Mcl/Mincl* expression and clinical EAE parameters.** Gene expression from spleens of rats subjected to EAE ( $n=150$ ) was correlated to clinical EAE phenotypes: maximal and cumulative score, disease duration, score at sampling (day 35 p.i.), maximal weight loss (in relation to day 7 p.i.) and day of disease onset. Significant correlations, using Pearson's correlation coefficient (and two-tailed p-value), are depicted in the figure together with lines from linear regression.

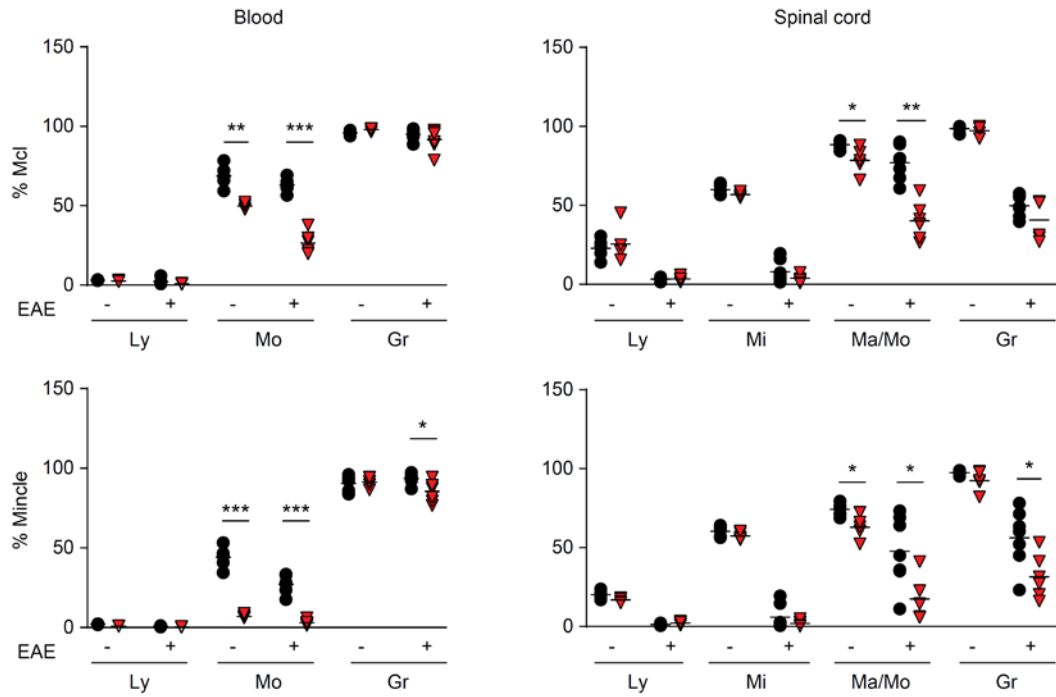

**Fig. S4. Reduced frequency of Mcl- and Mincle-expressing cells in CLRC congenic rats.** Flow cytometry analysis of cells isolated from peripheral blood and spinal cord of naive DA ( $n = 5$ ) and CLRC ( $n = 5$ ) rats and DA ( $n = 7$ ) and CLRC ( $n = 6$ ) rats 15 days p.i. The frequencies of Mcl- or Mincle-expressing lymphocytes, monocytes, granulocytes and spinal cord microglia were assessed. All comparisons were done with Mann–Whitney U test. \* $P < 0.05$ , \*\* $P < 0.01$ , \*\*\* $P < 0.001$ .

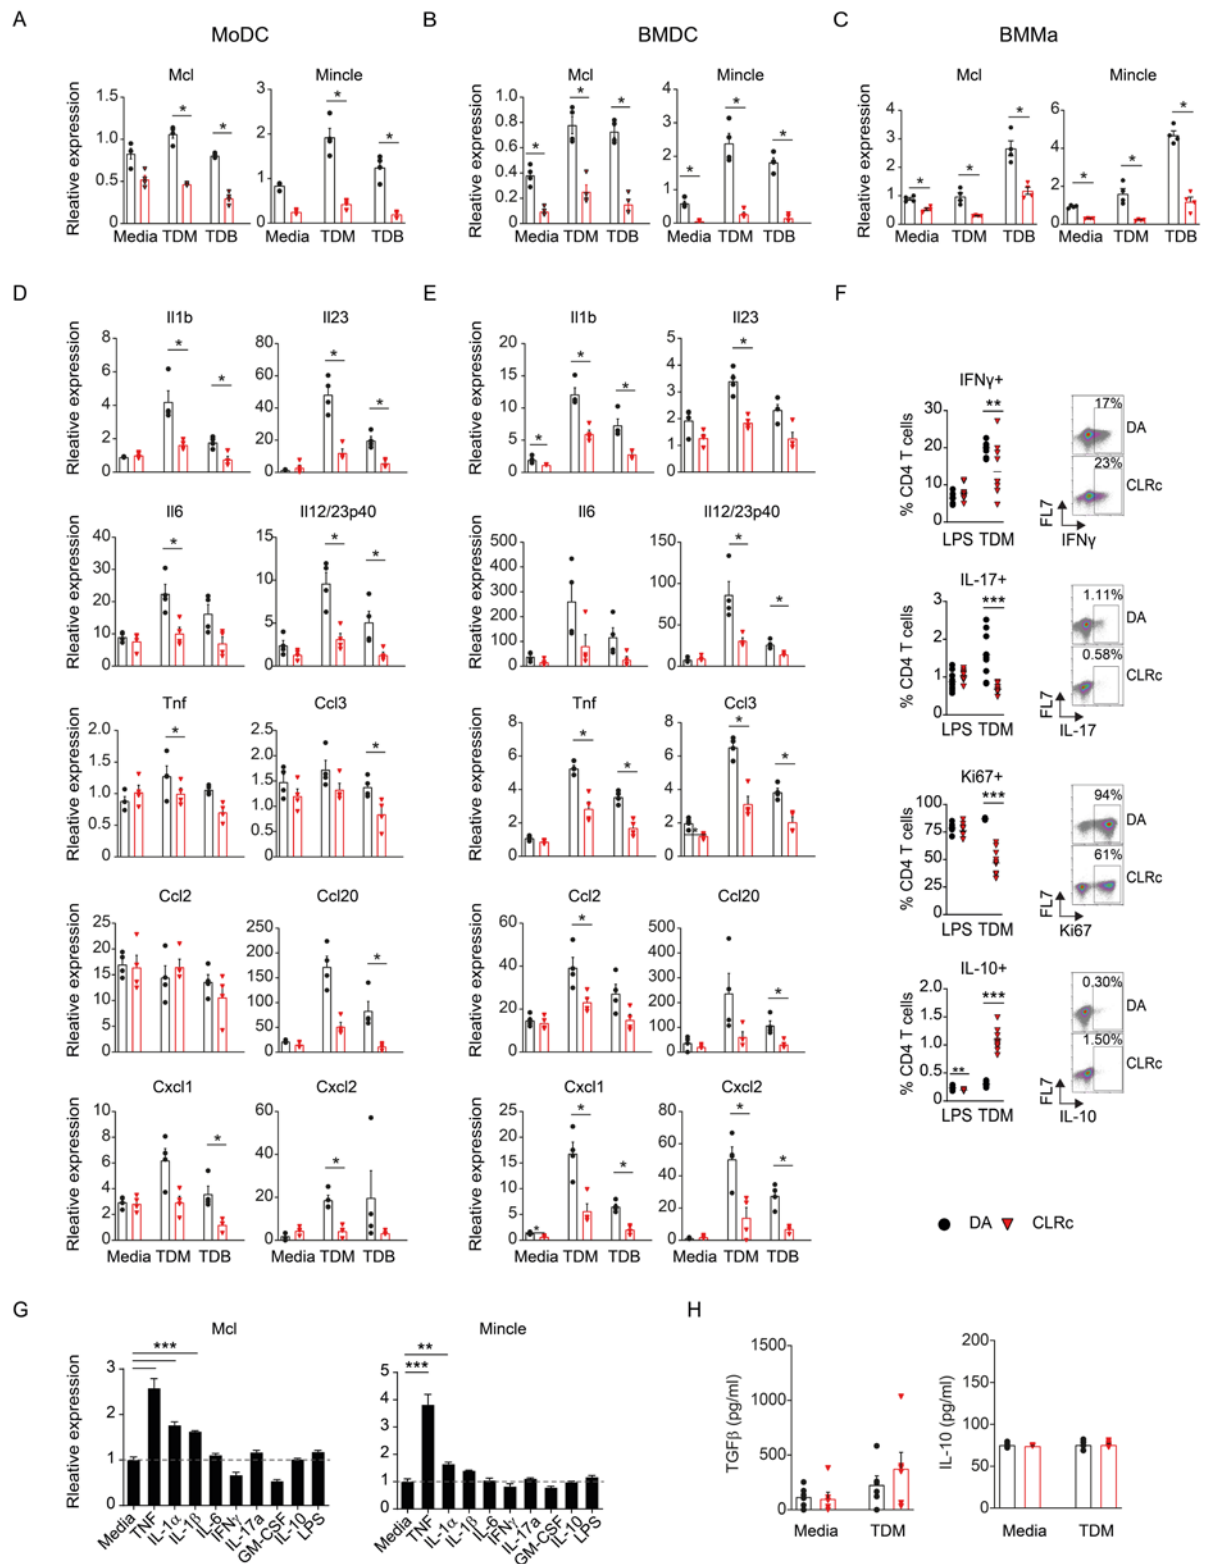

**Fig. S5. CLRc bone marrow-derived macrophages and dendritic cells have a reduced response to Mcl/Mincle stimulation.** Gene expression level (relative to *Actin*) of *Mcl* and *Mincle* in bone marrow-derived macrophages (BMma) (A), MoDC (B) and bone marrow-derived dendritic cells (BMDC) (C) from DA ( $n = 4$ ) and CLRc ( $n = 4$ ) rats following 18h TDM, TDB and LPS stimulation in vitro (representative of two experiments). qPCR analysis



(relative to *Actin*) of MoDC (**D**) and BMDC (**E**) samples from DA ( $n = 4$ ) and CLRC ( $n = 4$ ) rats of transcripts induced in the Mcl and Mincl pathway (representative of two experiments). (**F**) Pooled resting CD4<sup>+</sup> cells isolated from lymph nodes of naïve rats were stimulated for 4 days with anti-CD3, anti-CD28 and supernatant from stimulated DA ( $n=8$ ) or CLRC ( $n=8$ ) BMDCs. Flow cytometry analysis of CD4<sup>+</sup> T cells assessing cytokine production and proliferation (representative of two experiments). (**G**) Mcl and Mincl expression assessed by flow cytometry in BMMa from DA rats ( $n = 4$ ) following cytokine stimulation. (**H**) ELISA for TGF $\beta$  and IL-10 from supernatants of DA ( $n = 6$ ) and CLRC ( $n = 6$ ) rats from TDM-stimulated MoDC. Data are presented as mean  $\pm$  SEM. Comparisons were done with Mann–Whitney U test (**A–F** and **H**) and 1-way ANOVA with Dunnett's Multiple Comparison Test (**G**). \* $P < 0.05$ , \*\* $P < 0.01$ , \*\*\* $P < 0.001$ .

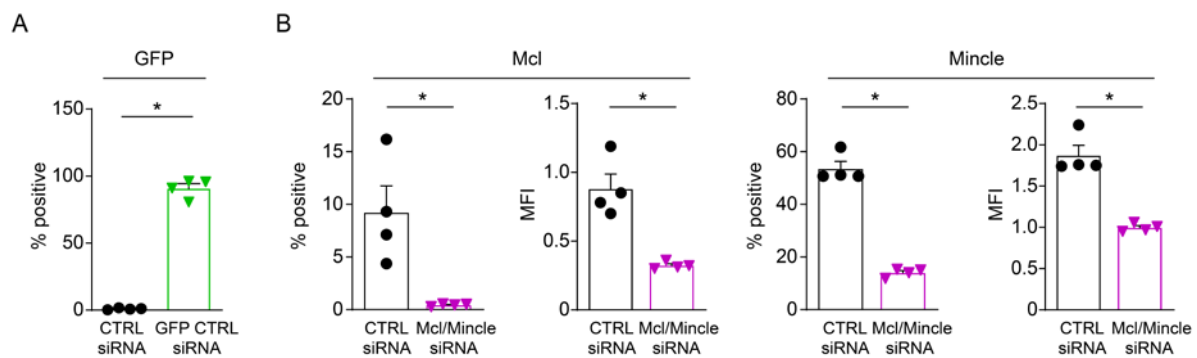

**Fig. S6. Evaluation of siRNA silencing of *Mcl* and *Mincl* in vitro.** Bone marrow-derived macrophages (BMMa) were treated with *Mcl/Mincl* or scrambled control siRNA. (**A**) Transfection efficiency of BMMa ( $n=4$ ) transfection with control-siRNA or GFP-control siRNA assessed by flow cytometry. (**B**) Expression of Mcl and Mincl in BMMa assessed by flow cytometry, following treatment with *Mcl/Mincl* siRNA ( $n=4$ ) or scrambled control siRNA ( $n=4$ ). Data are presented as mean  $\pm$  SEM. All comparisons were done with Mann–Whitney U test. \* $P < 0.05$ .

A

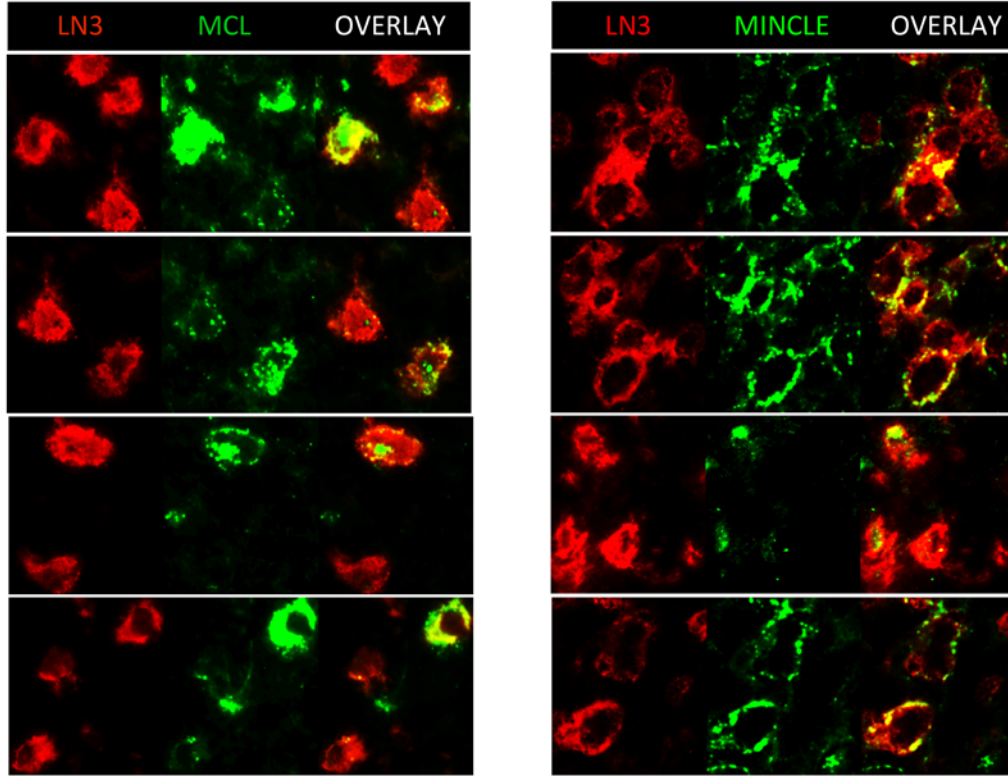

B

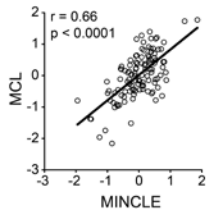

C

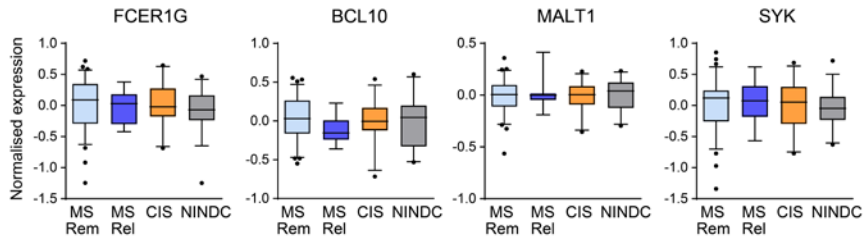

D

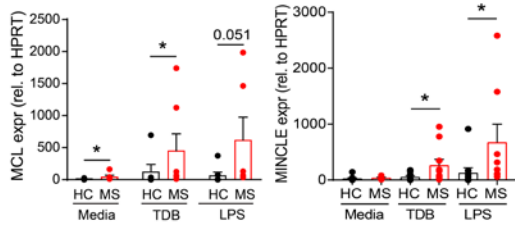

G

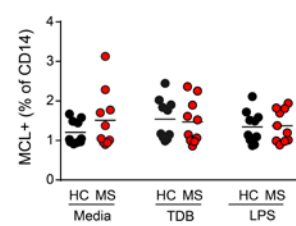

E

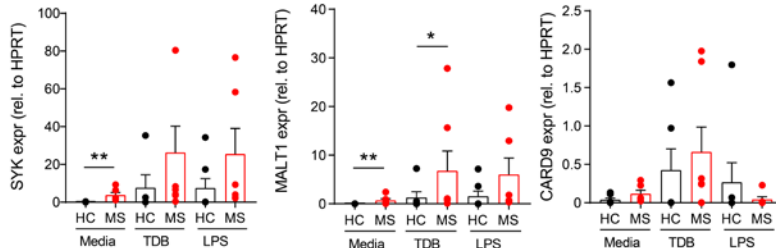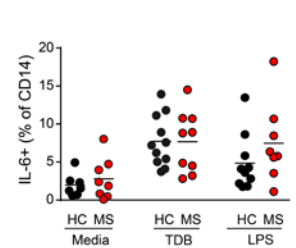

F

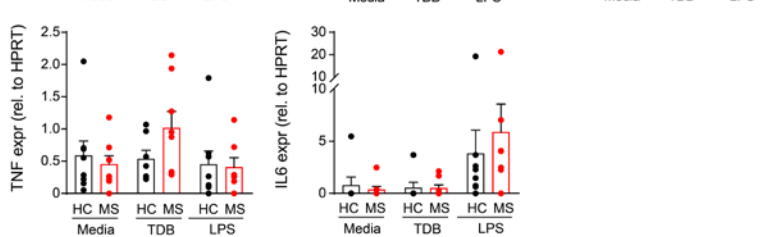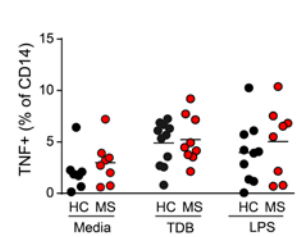

**Fig. S7. Expression of the MCL/MINCLE signaling pathway in MS patients.** (A) Additional representative immunofluorescent staining of MS lesions. MCL or MINCLE (green), HLA-DR expression (LN3, red), 40X magnification. (B) Expression analysis of PBMC from MS patients and non-inflammatory neurological disease controls (NINDCs) using RNA-sequencing. Expression analysis of PBMC from MS and CIS patients ( $n=115$ ) shows co-expression of *MCL* and *MINCLE* in PBMC. (C) Expression of *FCER1G*, *BCL10*, *MALT1* and *SYK* comparing MS patients in remission ( $n=73$ ), MS patients in relapse ( $n=14$ ), CIS patients ( $n=28$ ) and NINDCs ( $n=36$ ). (D, E and F) qPCR analysis of *MCL*, *MINCLE*, *SYK*, *MALT1*, *CARD9*, *TNF* and *IL6* expression in  $CD14^+$  enriched fraction from MS patients ( $n=8$ ) and healthy controls ( $n=8$ ) after 24 h stimulation. (G) Flow cytometry analysis of MCL, IL-6 and TNF production gated on  $CD14^+$  monocytes from MS patients ( $n=9$ ) and healthy controls ( $n=11$ ) after 48 h stimulation. Data are presented as mean  $\pm$  SEM or box-plots with whiskers representing 5-95 percentile. The following statistical tests were used: Pearson's correlation coefficient with two-tailed p-value (B), 1-way ANOVA with Dunnett's Multiple Comparison Test (C) and Mann-Whitney U test (D, E, F and G). \* $P < 0.05$ ; \*\* $P < 0.01$ .

**Table S1.** Genotyping of the CLRc region on rat chromosome 4.

| SNP position (Mb) | 159.707       | 159.746        | 159.823          | 159.884       | 159.906       | 159.961        | 160.578     |
|-------------------|---------------|----------------|------------------|---------------|---------------|----------------|-------------|
| Gene Symbol       | <i>Dcir1</i>  | <i>Dcar1</i>   | <i>Dectin-2p</i> | <i>Mcl</i>    | <i>Mincle</i> | <i>Vom2r48</i> | <i>Pex5</i> |
|                   | <i>Clec4a</i> | <i>Clec4b2</i> | <i>Clec4n</i>    | <i>Clec4d</i> | <i>Clec4e</i> |                |             |
| Genotype          | DA            | <b>PVG</b>     | <b>PVG</b>       | <b>PVG</b>    | <b>PVG</b>    | <b>PVG</b>     | DA          |

**Table S2.** Correlation between CLR gene expression in spleen and different EAE phenotypes 35 days after EAE induction in (DAXPVG)xDA backcrossed rats ( $n=150$ ).

|                  | EAE<br>(yes/no) | Max EAE<br>score | Onset day | Cumulative<br>EAE score | Duration | Score at<br>day 35 | Weight<br>loss |
|------------------|-----------------|------------------|-----------|-------------------------|----------|--------------------|----------------|
| <i>Dcar1</i>     | 0.05            | 0.06             | 0.02      | 0.05                    | 0.07     | 0.04               | 0.05           |
| <i>Dectin-2p</i> | -0.07           | -0.03            | 0.04      | -0.05                   | -0.06    | -0.07              | -0.09          |
| <i>Mcl</i>       | 0.20*           | 0.19*            | -0.22**   | 0.25**                  | 0.28***  | 0.22**             | 0.29***        |
| <i>Mincle</i>    | 0.23**          | 0.20*            | -0.21**   | 0.26**                  | 0.28***  | 0.25**             | 0.31***        |
| <i>Vom2r48</i>   | -0.02           | 0.02             | 0.06      | -0.00                   | -0.00    | 0.04               | -0.05          |

Numbers indicate Pearson's correlation coefficient and statistical significance with \*  $p<0.05$ ,

\*\*  $p<0.01$ , \*\*\*  $p<0.001$ .

**Table S3.** Baseline characteristics of the human brain cohort.

| Patient ID | Lesion type    | Age (years) | MS type | Gender | Post-mortem delay (h) | Target     |
|------------|----------------|-------------|---------|--------|-----------------------|------------|
| MS 1       | Chronic active | 56          | n.a.    | n.a.   | 10:10 h               | MCL/MINCLE |
| MS 2       | Chronic active | 66          | SPMS    | F      | 6 h                   | MINCLE     |
| MS 3       | Active         | 77          | PPMS    | M      | 4:15 h                | MCL/MINCLE |
| MS 4       | Active         | 61          | n.a.    | n.a.   | 10:55 h               | MCL        |
| MS 5       | Active         | 51          | SPMS    | M      | 11:00 h               | MCL        |

n.a. data not available

**Table S4.** Baseline characteristics of the human RNA-sequencing cohort.

|                                   | RRMS<br>relapse<br>(n=14) | RRMS<br>remission<br>(n=73) | PPMS<br>(n=7) | SPMS<br>(n=8) | CIS<br>(n=28)  | NINDC<br>(n=36) |
|-----------------------------------|---------------------------|-----------------------------|---------------|---------------|----------------|-----------------|
| Age mean, (SD)                    | 35 (12.4)                 | 40 (12.4)                   | 51 (7.5)      | 52 (8.4)      | 36.5<br>(10.4) | 40.9<br>(12.5)  |
| Female sex, n (%)                 | 9 (64.3)                  | 52 (71.2)                   | 1 (14.3)      | 5 (62.5)      | 25 (89.3)      | 29 (80.5)       |
| EDSS, mean (SD)                   | 2.7 (1.2)                 | 2.0 (1.3)                   | 4.2 (1.1)     | 4 (0.7)       | 1.4 (1.0)      | n.a.            |
| Years since diagnosis, mean (SD)  | 1.7 (4.6)                 | 1.7 (4.3)                   | 3 (4.8)       | 4.9 (9.7)     | 0.4 (0.7)      | n.a.            |
| Immunomodulatory treatment, n (%) | 0 (0)                     | 0 (0)                       | 0 (0)         | 0 (0)         | 0 (0)          | n.a.            |

n.a. not applicable

**Table S5.** Baseline characteristics of the human in vitro stimulation cohort.

|                          | MS (n=9)   | HC (n=11)   | p-value |
|--------------------------|------------|-------------|---------|
| Age (mean, SD)           | 57.6 (5.2) | 49.9 (13,0) | 0.03    |
| Female sex (n, %)        | 3 (33 %)   | 4 (36 %)    | n.s.    |
| Tysabri treatment (n, %) | 9 (100%)   | n.a.        | n.a.    |
| RRMS, remission (n, %)   | 9 (100%)   | n.a.        | n.a.    |
| EDSS (mean, SD)          | 2.1 (1.4)  | n.a.        |         |

n.a. not applicable, n.s. not significant
